# Supplementary material
Source: publisher site journal article supplement (https://www.dovepress.com/article/335915)
Supplement: Supplementary file 1 [file get_supplementary_file.php]

**Supplementary materials**

**Figure S1**

**Figure S1: CLP induced sepsis-related lung injury in the mouse model**. A: Representative morphological images by H&E staining were presented to show the lung injury severity. B: IL-6 expression in sera and BALF were evaluated by ELISA. ***, *p* < 0.001 *versus* sham group.

**Figure S2**


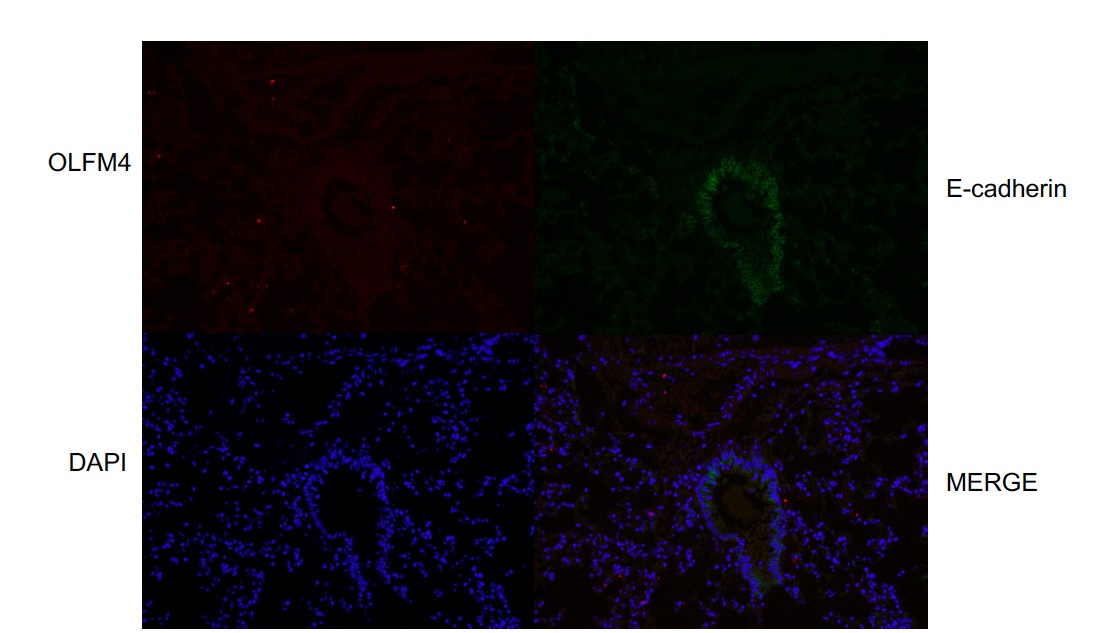


**Figure S2: OLFM4 was not colocalized with E-cadherin+ bronchial/lung epithelial cells.** Colocalization with OLFM4 was detected by immunofluorescence staining. OLFM4 was stained red, **b**ronchial/lung epithelial cells were marked by E-cadherin in green, and nuclei were stained with DAPI.

**Table S1. Primer sequence for the 10 critical genes.**

| Gene | Primer Sequences (5' to 3') |
| --- | --- |
| Human GAPDH | Forward: GGG AAG GTG AAG GTC GGA GT |
| Reverse: GGG GTC ATT GAT GGC AAC A |
| Human IL-6 | Forward: AAC AAC CTG AAC CTT CCA AAG |
| Reverse: CAA ACT CCA AAA GAC CAG TGA |
| Human IL-8 | Forward: CTG TTA AAT CTG GCA ACC CTA |
| Reverse: GTG AGG TAA GAT GGT GGC TAA |
| Human LCN2 | Forward: CTC TAC GGG AGA ACC AAG GA |
| Reverse: GGA CAG GGA AGA CGA TGT G |
| Human CAMP | Forward: ATA ACA AGA GAT TTG CCC TGC |
| Reverse: CTG TCC TGG GTA CAA GAT TCC |
| Human LTF | Forward: TAT CTT GCT GTG GCG GTG GTT |
| Reverse: GCG GTG TGG CAG GAC TTC TT |
| Human RETN | Forward: GGT GTC TAG CAA GAC CCT GTG |
| Reverse: CAA TGC TGC TTA TTG CCC TAA |
| Human ELANE | Forward: CTC TAC CCC GAT GCC TTT G |
| Reverse: CGG AGC GTT GGA TGA TAG AG |
| Human PGLYRP1 | Forward: AGC CCT GAG GTC CAA CTA TGT |
| Reverse: TGG TTG CCT GGA GAG AGT GTA |
| Human BPI | Forward: TTA TTT CCA GAC TCT GCC AGT |
| Reverse: GCC ACC AGA CCA TAG TTG A |
| Human DEFA4 | Forward: TGC CTC ATT GGT GGT GTG AGT T |
| Reverse: GCG TTC CCA GCA TGA CAT TCT |
| Human MPO | Forward: AGA GGC AAG AAA GAG ATA CCA |
| Reverse: CCC ATA AGT CAA CCA CAC A |
| Human OLFM4 | Forward: GCT GTG ACT CAA ACT CTC CCT |
| Reverse: AAC CCA CAA TCC ATT CTC ATC |
